# Supplementary material for: A novel method to fabricate discrete porous carbon hemispheres and their electrochemical properties as supercapacitors
Source: Royal Society of Chemistry journal article supplement (doi:10.1039/c3cp52736k), 2013-01-01
Supplement: c3cp52736k.pdf [file c3cp52736k.pdf]

# A Novel Method to Fabricate Discrete Porous Carbon Hemispheres and Their Electrochemical Properties as Supercapacitors

Jiafu Chen, Zhanlin Lang, Qun Xu,\* Jianan Zhang, Jianwei Fu, and Zhimin Chen

College of Materials Science and Engineering, Zhengzhou University, Zhengzhou, 450052,

P.R.China

\* E-mail address: qunxu@zzu.edu.cn

## 1. SEM and TEM photos of the samples with 15 wt% DVB

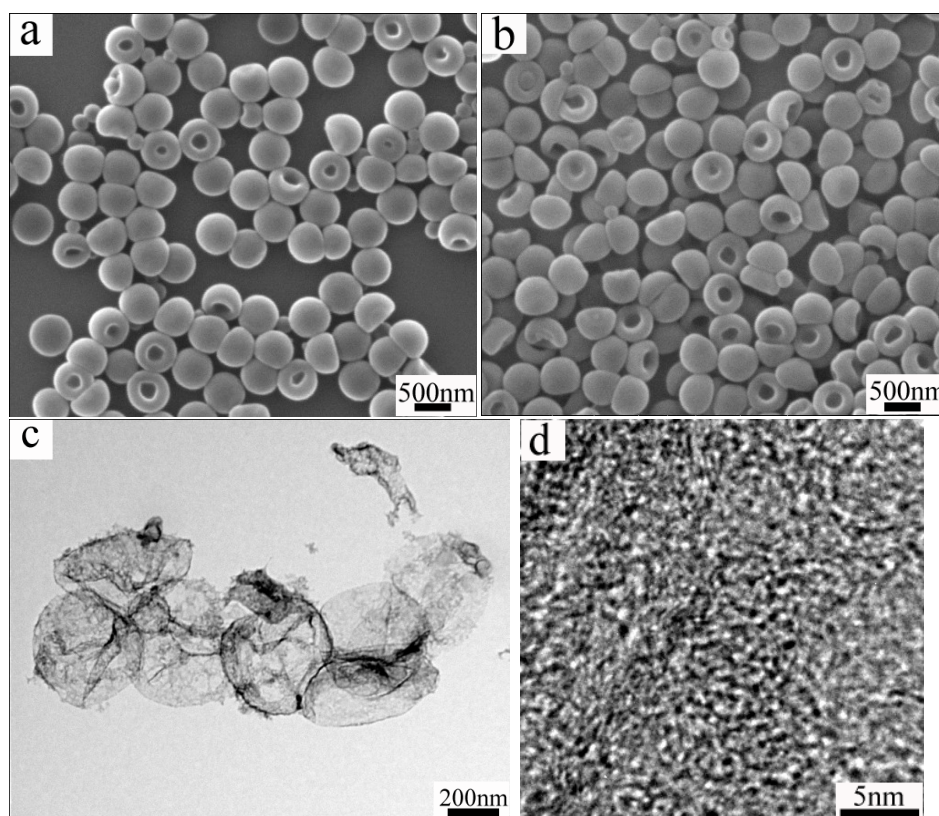

**Fig. S1** SEM and TEM photos of the samples with 15 wt% DVB: (a) SEM photo of H15, (b) SEM photo of SH15, (c-d) TEM photos of CH15.

## 2. Texture properties of the CH35 carbon material

**Table S1** Texture properties of the CH35 carbon material

| Sample | $S_{\text{BET}}$<br>( $\text{m}^2/\text{g}$ ) | $V_{\text{t}}$ <sup>a</sup><br>( $\text{cm}^3/\text{g}$ ) | $V_{\text{mi}}$ <sup>b</sup><br>( $\text{cm}^3/\text{g}$ ) | $V_{\text{mea}}$ <sup>c</sup><br>( $\text{cm}^3/\text{g}$ ) | $D_{\text{HK}}$ <sup>d</sup><br>(nm) |
|--------|-----------------------------------------------|-----------------------------------------------------------|------------------------------------------------------------|-------------------------------------------------------------|--------------------------------------|
| CH35   | 676                                           | 2.63                                                      | 0.27                                                       | 2.36                                                        | 0.66                                 |

- a Total pore volume.
- b Micropore volume determined by using the Dubinin-Radushkevich (D-R) equation.
- c Mesopore and macropore volume obtained by subtracting  $V_{\text{mi}}$  from  $V_{\text{t}}$ .
- d Median micropore diameter calculated by the H-K method.

3. The cyclic voltmmograms are obtained at different scan rates, and specific capacitance,  $C_s(\text{F}/\text{g})$ , is calculated from these curves by the following equation

$$C = \frac{2\Delta S}{m\nu U}$$

where  $\Delta S$  is the area of the current (A) against time (s) curve,  $m$  is the mass of carbon hemispheres in the electrode (g),  $\nu$  is the scan rate, and  $U$  is the potential window (V).

#### 4. The supercapacitor performance of CH25 estimated by the two-electrode system

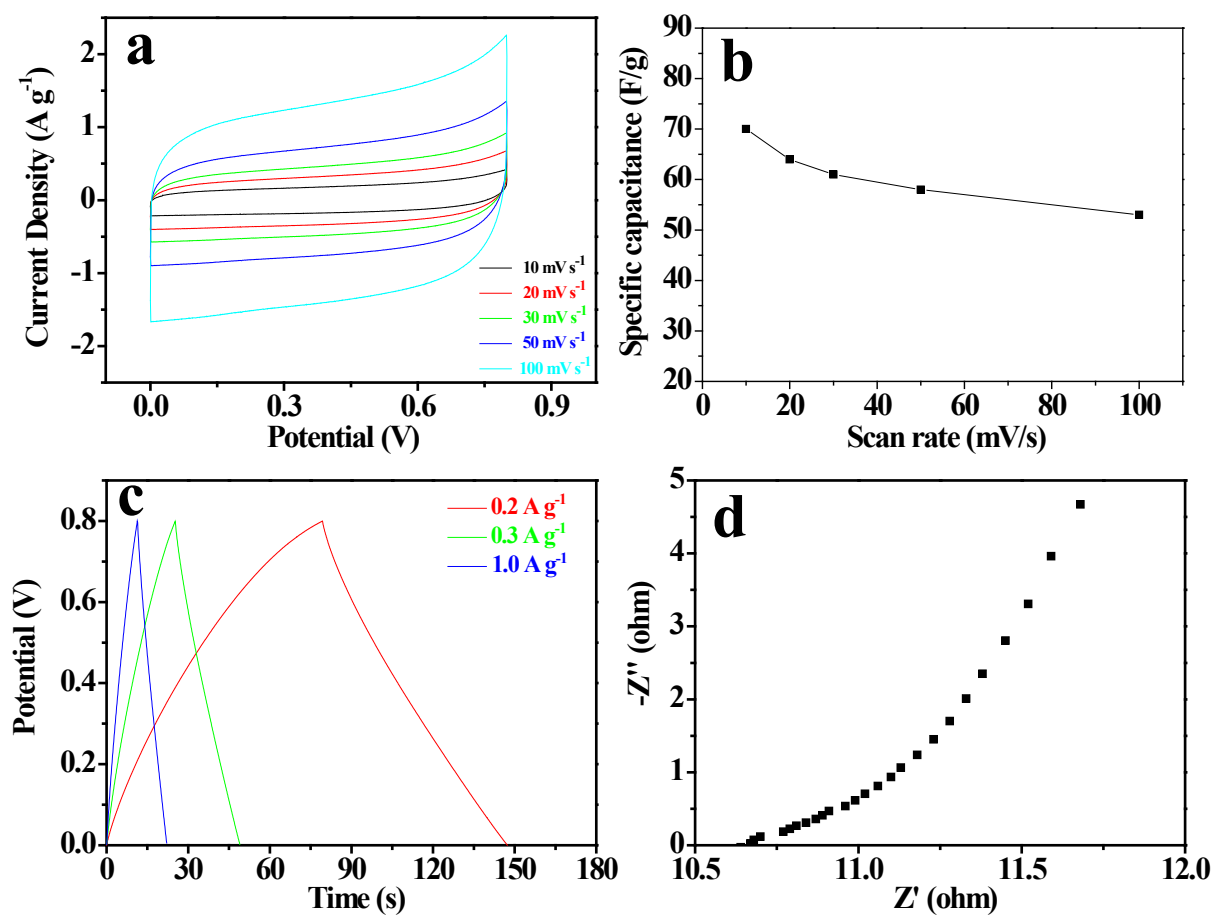

**Fig. S2.** (a) Cyclic voltammetry (CV) curves of CH25 at the scan rates of 10, 20, 30, 50, and 100 mV s<sup>-1</sup>. (b) The correlation of specific capacitance with scan rates for CH25. (c) Chronopotentiometry (CP) curves of CH25 at current densities of 0.2, 0.3, and 1.0 A g<sup>-1</sup>. (d) Nyquist plot at open circuit potential with amplitude of 5 mV for the CH25 sample with 1 M H<sub>2</sub>SO<sub>4</sub> as an electrolyte.

### 5. The thermogravimetric curves of the sulfonated (P(St-co-DVB)) capsules

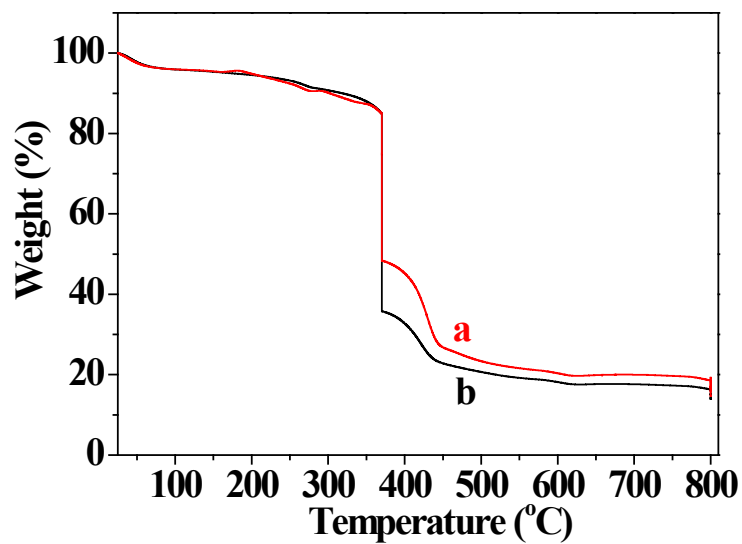

**Fig. S3.** The thermogravimetric curves of the sulfonated (P(St-co-DVB)) capsules under the carbonization conditions: (a) SH35, (b) SH25, which were measured by using the TGA/DSC.
